**Table 1—Peak concentration ( $C_{max}$ ), time to peak concentration ( $t_{max}$ ) and time detection ( $t_{det}$ ) following a single dose of 5 mg glipizide in seven NIDDM patients, during hyperglycemia and normoglycemia**

| Patient        | $C_{max}$ ( $\mu\text{g/ml}$ ) |                | $t_{max}$ (min) |                | $t_{det}$ (min) |                |
|----------------|--------------------------------|----------------|-----------------|----------------|-----------------|----------------|
|                | Hyper-glycemia                 | Normo-glycemia | Hyper-glycemia  | Normo-glycemia | Hyper-glycemia  | Normo-glycemia |
| 1              | 542                            | 139            | 150             | 90             | 150             | 90             |
| 2              | 399                            | 1,572          | 90              | 90             | 90              | 45             |
| 3              | 239                            | 484            | 90              | 150            | 90              | 45             |
| 4              | 99                             | 415            | 150             | 45             | 150             | 45             |
| 5              | 397                            | 780            | 90              | 45             | 45              | 45             |
| 6              | 224                            | 446            | 150             | 150            | 90              | 45             |
| 7              | 1,747                          | 1,475          | 150             | 90             | 15              | 15             |
| Means $\pm$ SE | 521 $\pm$ 211                  | 758 $\pm$ 210  | 124 $\pm$ 12    | 94 $\pm$ 16    | 90 $\pm$ 18*    | 47 $\pm$ 8*    |

\*  $P < 0.05$ .

glycemia may cause a delay in the absorption of sulfonylurea drugs. The glipizide absorption rate varies greatly between subjects, probably because of differences in the rate of gastric emptying and hence in glipizide dissolution rate (3). Hyperglycemia slows gastric emptying, and this factor can modify drug absorption (4,5). The mechanisms responsible for the inhibitory action of hyperglycemia on gastric motility are not known. Alterations in gastrointestinal hormone secretion (such as motilin, pancreatic polypeptide, somatostatin, glucagon, gastrin, and gastric inhibitory polypeptide) may be important (6–8). On the other hand, hyperglycemia stimulates pyloric motility (9) and may suppress vagal nerve activity, producing an autonomic nerve dysfunction (10). According to our results, hyperglycemia per se could influence the therapeutic efficacy of the sulfonylureas, delaying their absorption and, therefore, their hypoglycemic effect in relation to the meal-induced increase of blood glucose.

ENRIC ESMATJES, MD  
PAZ VINUESA, MD  
PINO NAVARRO, MD  
CAMINO RODRIGUEZ-VILLAR, MD  
RAMON GOMIS, MD  
ENRIC VILARDELL, MD

From the Endocrinology and Diabetes Unit, Hospital Clinic, University of Barcelona, Barcelona, Spain.

Address correspondence to Enric Esmatjes, MD, Endocrinology and Diabetes Unit, Hospital Clinic, C/Villarroel 170, 08036 Barcelona, Spain.

**Acknowledgments**—We wish to thank Dra. M<sup>a</sup> Antonia Arbos, Dra. Anita Novials, and Dra. Rosa Gasa for skillful technical assistance.

#### References

1. Groop LC, Luzi L, DeFronzo RA, Melander A: Hyperglycaemia and absorption of sulphonylurea drugs. *Lancet* ii:129–130, 1989
2. Wahlin-Boll E, Melander A: High performance liquid chromatographic determination of glipizide and some other sulfonylurea drugs in serum. *J Chromatogr* 164:541–546, 1979
3. Wahlin-Boll E, Almer L-O, Melander A: Bioavailability, kinetics and effects of glipizide in type 2 diabetics. *Clin Pharmacokinet* 7:363–372, 1982
4. Elias E, Gibson GT, Greenwood LF: The slowing of gastric emptying in response to starch in test meals. *J Physiol* 194:317–326, 1968
5. Macgregor IL, Gueller R, Watts HD, Meyer JH: The effect of acute hyperglycaemia on gastric emptying in man. *Gastroenterology* 70:190–196, 1976
6. Morgan LM, Tredger JA, Hampton SM, French AP, Peake JC, Marks V: The effect

of dietary modification and hyperglycaemia on gastric emptying and gastric inhibitory polypeptide (GIP) secretion. *Br J Nutr* 60:29–37, 1988

7. Barnett JL, Owyang C: Serum glucose concentration as a modulator of interdigestive gastric motility. *Gastroenterology* 94:739–744, 1988
8. Hilsted J: Pathophysiology in diabetic autonomic neuropathy: cardiovascular, hormonal and metabolic studies. *Diabetes* 31:730–737, 1982
9. Fraser R, Horowitz M, Graham S, Dent J: Acute hyperglycaemia and antro-pyloroduodenal motility in humans (Abstract). *Gastroenterology* 96:A157, 1989
10. Hirano T, Nijima A: Effects of 2-deoxyglucose, glucose and insulin efferent activity in gastric vagus nerve. *Experientia* 36:1197–1205, 1980

## Impaired Glucose Tolerance of Pregnancy by WHO and NDDG Criteria

Pettitt et al.'s article "Comparison of World Health Organization and National Diabetes Data Group procedures to detect abnormalities of glucose tolerance during pregnancy" (17:1264, 1994), is an important paper to help rationalize the diagnostic approach to gestational diabetes. However, I feel the authors may be unduly harsh on the two-step procedure (1-h screening test and then an oral glucose tolerance test). Using the World Health Organization (WHO) criteria, there are three possible outcomes after diagnostic testing: normal, impaired glucose tolerance, or diabetes. Using the formal criteria of the National Diabetes Data Group for diabetes in pregnancy, it's an all or nothing result, either normal or diabetic. Previous studies have shown that one abnormal value is of some predictive value for neonatal morbidity (1,2), and thus I think that the data on the sub-

jects for the two-step test who have one abnormal value should be provided in Tables 1 and 2. I suspect that subjects with one abnormal value on the 100-g test, who would be considered by many to have impaired glucose tolerance of pregnancy, may correlate with those who had impaired glucose tolerance by WHO criteria. Of more importance would be the finding that these subjects with one abnormal value on the 100-g oral glucose tolerance test also fell into the group with

macrosomia or requiring a cesarean section. Provision of this additional information would be beneficial.

EDMOND A. RYAN, MD

From the Department of Medicine, University of Alberta, Edmonton, Alberta, Canada.

Address correspondence to Edmond A. Ryan, MD, University of Alberta, 362 Heritage Medical Research Centre Edmonton, Alberta Canada T6G 2S2.

.....  
**References**

1. Langer O, Brustman L, Anyaegbunam A, Mazze RS: The significance of one abnormal glucose tolerance test value on adverse outcome in pregnancy. *Am J Obstet Gynecol* 157:758–763, 1987
2. Lindsay MK, Graves W, Klein L: The relationship of one abnormal glucose tolerance test value and pregnancy complications. *Obstet Gynecol* 73:103–106, 1989
